# Supplementary material for: A hydrogen bonded azine as a building block for π-conjugated polymers and their semiconducting properties
Source: Royal Society of Chemistry journal article supplement (doi:10.1039/d3py01346d), 2024-01-01
Supplement: d3py01346d1.pdf [file d3py01346d1.pdf]

## Supporting Information

### Hydrogen bonded azine as building block for $\pi$ -conjugated polymers and their semiconducting properties

Kunrong Li,<sup>‡a</sup> Hezhe Zhang,<sup>‡b</sup> Cheng Chang,<sup>‡c</sup> Kaiwen Lin,<sup>d</sup> Bo Zhang,<sup>a</sup> Zaifei Ma,<sup>\*b</sup> Dacheng Wei<sup>\*c</sup> and Qing Zhang<sup>\*a</sup>

<sup>a</sup>Shanghai Key Laboratory of Electrical Insulation and Thermal Aging, School of Chemistry and Chemical Engineering, Shanghai Jiaotong University, Shanghai 200240, China. E-mail: qz14@sjtu.edu.cn

<sup>b</sup>State Key Laboratory for Modification of Chemical Fibers and Polymer Materials Center for Advanced Low-dimension Materials, College of Materials Science and Engineering, Donghua University, Shanghai 201620, China. E-mail: mazaifei@dhu.edu.cn

<sup>c</sup>State Key Laboratory of Molecular Engineering of Polymers, Department of Macromolecular Science, Fudan University, Shanghai 200433, China. E-mail: weidc@fudan.edu.cn

<sup>d</sup>Department of Materials and Food, University of Electronic Science and Technology of China, Zhongshan Institute, Zhongshan 528402, China.

<sup>‡</sup>These authors contributed to this work equally.

### Table of Contents

|                                                                                 |    |
|---------------------------------------------------------------------------------|----|
| Materials and Characterization .....                                            | 2  |
| Organic photovoltaic (OPV) device fabrication and measurement .....             | 3  |
| Organic Field-Effect Transistor (OFET) device fabrication and measurement ..... | 4  |
| .....                                                                           | 4  |
| Synthesis of Monomer and Polymers. ....                                         | 5  |
| Crystallographic data .....                                                     | 13 |
| Theoretical calculation of P1 and P2 .....                                      | 15 |
| Thermal properties .....                                                        | 16 |
| Absorption spectrum .....                                                       | 16 |
| Device performance of OPV and OFET .....                                        | 16 |
| 2D Grazing Incidence Wide Angle X-ray Scattering (GIWAXS) data .....            | 17 |
| <sup>1</sup> H NMR, <sup>13</sup> C NMR and MALDI-MS Spectrum.....              | 18 |
| References .....                                                                | 29 |

## Materials and Characterization

### Materials

The reagents were purchased from Adamas, Sigma-Aldrich, J&K Scientific, Bide Pharmatech, SunaTech and Derthon. All chemicals were reagent grade and used as received. Tetrahydrofuran (THF) was freshly distilled over sodium wires and benzophenone prior to use. The (*IE,2E*)-1,2-bis(thiophen-2-ylmethylene)hydrazine (**Az**) and (*IE,2E*)-1,2-bis((5-bromothiophen-2-yl)methylene)hydrazine (**Az-Br**) were synthesized according to the literature.<sup>1</sup> (2,2'-((2*Z*,2'*Z*)-((12,13-Bis(2-ethylhexyl)-3,9-diundecyl-12,13-dihydro-[1,2,5]-thiadiazolo-[3,4-*e*]thieno[2,"3":4'5']thieno[2',3':4,5]-pyrrolo[3,2-*g*]thieno[2',3':4,5]thieno[3,2-*b*]indole-2,10-diyl)bis(methanylylidene))-bis(5,6-di-fluoro-3-oxo-2,3-dihydro-1*H*-indene-2,1-diylidene))dimalono-nitrile (**Y6**) was purchased from Solarmer Materials Inc.

### Characterization

<sup>1</sup>H NMR and <sup>13</sup>C NMR spectra were measured on a Bruker 400 MHz spectrometer with tetramethylsilane (TMS) as an internal reference at room temperature. Matrix-assisted laser desorption ionization time-of-flight (MALDI-TOF) mass spectrometry was carried on a Bruker Daltonics. Elemental analyses were carried on an Elementar Vario EL Cube system. The single Crystal X-ray diffraction analysis was performed on a Bruker D8 VENTURE X-ray diffractometer. UV-vis spectra were obtained with a Perkin Elmer Lambda 20 UV-vis spectrophotometer. Cyclic voltammetry (CV) was carried on a CHI600 electrochemical workstation in a deoxygenated anhydrous acetonitrile solution of *tetra*-butylammonium hexafluorophosphate (*n*-Bu<sub>4</sub>NPF<sub>6</sub>) (0.10 M) at the scan rate of 100 mV s<sup>-1</sup> under nitrogen. A platinum, an Ag/Ag<sup>+</sup> (AgNO<sub>3</sub>, 0.01 M in acetonitrile) electrode, and a platinum disk electrode were used as the counter electrode, reference electrode and working electrode, respectively. Before and after measuring the samples, the cell was calibrated with the ferrocene/ferrocenium (Fc/Fc<sup>+</sup>) redox couple (4.8 eV below vacuum level) as an external standard which was measured under the same conditions. Polymer films were coated on the surface of the platinum disk. Gel permeation chromatography (GPC) analyses of polymers were carried out on

a Waters HPLC with a polystyrene gel column (Agilent PL gel 5  $\mu\text{m}$ , MIXEDC) at room temperature. A PerkinElmer Pyris 1 was used for thermogravimetric analyses (TGAs) at a heating rate of  $10^\circ\text{C min}^{-1}$  under nitrogen. Differential scanning calorimetry (DSC) analysis was carried out on a Netzsch Instruments DSC 204 F1 at a scan rate of  $10^\circ\text{C min}^{-1}$  under nitrogen. The sample of **P1** and **P2** was heated to  $200^\circ\text{C}$  and was held for 2 min to remove thermal history, followed by cooling to  $20^\circ\text{C}$  and then by heating to  $200^\circ\text{C}$ . The sample of **P3** was heated to  $350^\circ\text{C}$  and was held for 2 min to remove thermal history, followed by cooling to  $20^\circ\text{C}$  and then by heating to  $350^\circ\text{C}$ . The atomic force microscopy (AFM) images of thin films were taken on a Bruker JPK atomic force microscope. Grazing-incidence wide-angle X-ray scattering (GIWAXS) study were carried out at the beamline 14B1 of Shanghai Synchrotron Radiation Facility (SSRF).

### **Organic photovoltaic (OPV) device fabrication and measurement**

The structure of solar cell devices was ITO/PEDOT:PSS/**P1:Y6**/PFN-Br/Ag. After cleaning and sonicating the ITO substrates, PEDOT:PSS (A14083 from Hareus) was spin-cast onto the substrates at 5000 rpm for 30 s, and then dried at  $150^\circ\text{C}$  for 15 min in  $\text{N}_2$  atmosphere. The **P1:Y6** (1:1.2 w/w) was dissolved in chloroform (the total concentration of blends was  $14 \text{ mg mL}^{-1}$ ) with 1-chloronaphthalene (0.5 wt.%) as additive. The **P1:Y6** solution was spin-cast at 3500 rpm for 30 s onto PEDOT:PSS film followed by a temperature annealing of  $100^\circ\text{C}$  for 10 min. A thin PFN-Br layer (0.5 mg/mL in methanol and 0.5% vol% glacial acetic acid, 3000 rpm) was coated on the active layer, followed by the deposition of Ag (evaporated under  $6 \times 10^{-6} \text{ Pa}$  through a shadow mask). The effective device area was  $4.0 \text{ mm}^2$  defined by shallow masks. The current density-voltage ( $J$ - $V$ ) curves of devices were measured using a Keithley 2400 system in the  $\text{N}_2$ -filled glovebox under AM 1.5G ( $100 \text{ mW cm}^{-2}$ ) using an Enlitech solar simulator. The EQE spectra were measured using a QE-R Solar Cell Spectral Response Measurement System (Enli Technology Co., Ltd.). The light intensity at each wavelength was calibrated using a standard monocrystalline Si photovoltaic cell.

### Organic field-effect transistor (OFET) device fabrication

An n-type heavily doped Si wafer with a 300-nm SiO<sub>2</sub> layer (capacitance =10 nF cm<sup>-2</sup>) was used as a bottom-gate electrode and dielectric layer. To fabricate BGBC structured OTFTs, 5/50-nm-thick Cr/Ag layers were thermally evaporated on the pristine SiO<sub>2</sub>/Si substrates through the photolithography process as bottom S/D electrodes (W/L = 3753/82 μm). During the photolithography, the S1813 photoresist was liftoff by the stripper Remove PG and the substrate with S/D electrodes was ultrasonic cleaned with heptane, ethanol, acetone, and chloroform. The cleaned substrate with electrodes was treated with OTS in a vacuum oven at a temperature of 120°C, forming an OTS self-assembled monolayer, and then sonicated in heptane, ethanol, and chloroform to remove extra OTS molecules. The π-conjugated polymer was deposited on the OTS treated Si/SiO<sub>2</sub> substrates by spin-coating from its chloroform solution (5 mg mL<sup>-1</sup>). The electrical characteristics of the OFET devices were measured by a Keithley 4200 semiconductor analyzer in ambient condition. The field-effect mobility is calculated in the saturation regime by the following equation:

$$\mu = \frac{2L}{WC_i} \left( \frac{\partial \sqrt{I_D}}{\partial V_G} \right)^2$$

where  $I_D$  is the drain-source current,  $\mu$  is the field-effect mobility,  $W$  is the channel width,  $L$  is the channel length,  $C_i$  is the capacitance per unit area of the gate dielectric layer,  $V_G$  is the gate voltage.

## Scheme S1. The synthesis of intermediates and monomers.

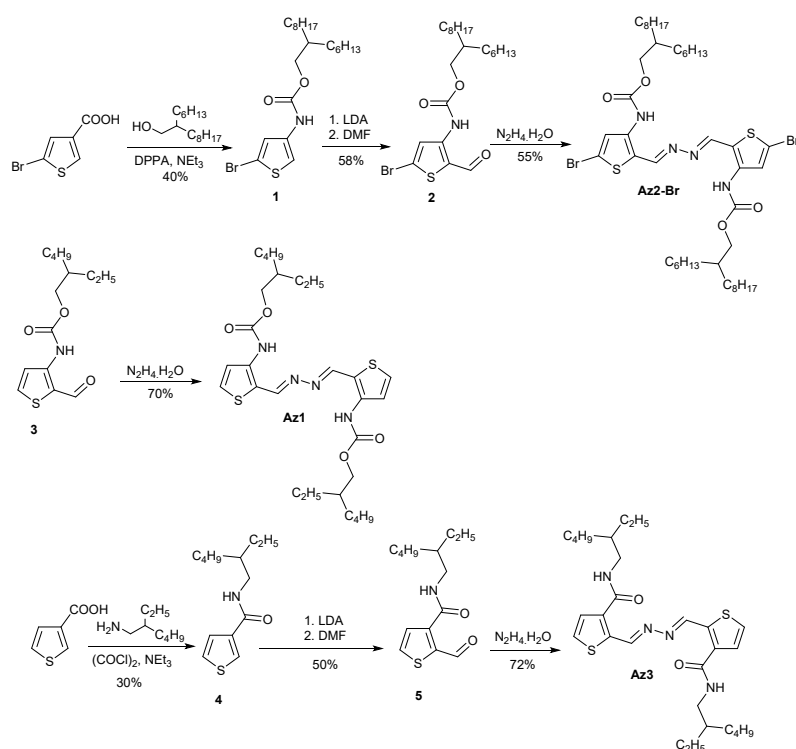

## Synthesis of monomers and polymers

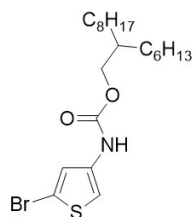

**Synthesis of 2-hexyldecyl (5-bromothiophen-3-yl)carbamate (1).** It was synthesized according to literature.<sup>2</sup> 5-bromothiophene-3-carboxylic acid (5.00 g, 24.15 mmol), diphenyl phosphorazidate (DPPA) (8.64 g, 31.39 mmol), 2-hexyldecan-1-ol (5.86 g, 24.15 mmol) and triethylamine (4.89 g, 48.30 mmol) were dissolved in anhydrous tetrahydrofuran (50.0 mL). The mixture was refluxed overnight under nitrogen. After cooling down to room temperature, the solvent was removed under reduced pressure. The crude product was purified by column chromatography on silica gel using petroleum ether/ethyl acetate (35:1) as the eluent to give compound **1** (4.31 g, 40%) as a yellow oil. <sup>1</sup>H NMR (400 MHz, CDCl<sub>3</sub>) δ 7.09 (s, 1H), 6.96 (s, 1H), 6.94 (s, 1H), 4.06 (d, *J* = 4.4 Hz, 2H), 1.64 (s, 1H), 1.29 (m, 24H), 0.89 (m, 6H). <sup>13</sup>C NMR (101 MHz,

CDCl<sub>3</sub>)  $\delta$  153.85, 135.61, 123.73, 111.99, 109.17, 68.45, 37.67, 32.02, 31.94, 31.26, 30.10, 29.76, 29.69, 29.45, 26.82, 26.79, 22.80, 22.78, 14.24, 14.23.

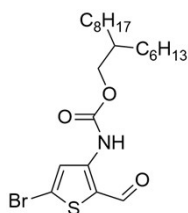

**Synthesis of 2-hexyldecyl (5-bromo-2-formylthiophen-3-yl)carbamate (2).**

Diisopropylamine (1.81 g, 17.92 mmol) and *n*-butyllithium (7.2 mL, 2.5 M, 17.92 mmol) were added to anhydrous tetrahydrofuran (30.0 mL) at -78°C under nitrogen to prepare lithium diisopropyl amide (LDA). After stirring for 1 h, a solution of compound **1** (4.00 g, 8.96 mmol) in anhydrous tetrahydrofuran (20.0 mL) was added dropwise at -78°C. After stirring for another 1 h, piperidine-1-carbaldehyde (2.03 g, 17.92 mmol) was added to the mixture, and the reaction was stirred for 1 h at -78°C. Then, the reaction was warmed to room temperature and stirred for 2 h. Subsequently, the mixture was poured into water (50 mL), and acidified with aqueous hydrochloric acid solution (1.0 M), then the mixture was extracted with dichloromethane for three times. The organic phase was dried over anhydrous sodium sulfate. After removal of the solvent under reduced pressure, the crude product was purified by column chromatography on silica gel using petroleum ether/ethyl acetate (35:1) as the eluent to give compound **2** (2.47 g, 58%) as a yellow oil. <sup>1</sup>H NMR (400 MHz, CDCl<sub>3</sub>)  $\delta$  9.96 (s, 1H), 9.51 (s, 1H), 8.01 (s, 1H), 4.09 (d, *J* = 5.6 Hz, 2H), 1.67 (s, 1H), 1.32 (m, 24H), 0.89 (m, 6H). <sup>13</sup>C NMR (101 MHz, CDCl<sub>3</sub>)  $\delta$  182.27, 153.29, 145.00, 125.59, 120.87, 69.12, 37.61, 32.00, 31.92, 31.15, 31.13, 30.03, 29.70, 29.67, 29.42, 26.80, 26.77, 22.79, 22.77, 14.23, 14.21.

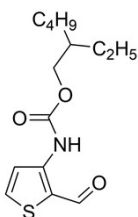

**Synthesis of 2-ethylhexyl (2-formylthiophen-3-yl)carbamate (3).** Compound **3** was prepared by a similar synthetic procedure to **2**. 2-Ethylhexyl thiophen-3-ylcarbamate

(1.70 g, 6.66 mmol) and anhydrous THF (20.0 mL) were added into a dry Schlenk bottle at  $-78^{\circ}\text{C}$  under nitrogen. After stirring a few minutes, *n*-butyllithium (5.3 mL, 2.5 M, 13.31 mmol) was slowly added, and the reaction was stirred at  $-78^{\circ}\text{C}$  for 1 h under nitrogen. Subsequently, anhydrous *N,N*-dimethylformamide (0.97 g, 13.31 mmol) was quickly added into the reaction. After stirring for 1 h, the mixture was warmed to room temperature and was further stirred for 2 h. The mixture was poured into water (50 mL), and acidified with aqueous hydrochloric acid solution (1.0 M), then extracted with dichloromethane for three times. The organic phase was dried over anhydrous sodium sulfate. After removal of the solvent under reduced pressure, the crude product was purified by column chromatography on silica gel using petroleum ether/ethyl acetate (30:1) as the eluent to give compound **3** (1.53 g, 81%) as a pale-yellow oil.  $^1\text{H}$  NMR (400 MHz,  $\text{CDCl}_3$ )  $\delta$  9.93 (s, 1H), 9.65 (s, 1H), 7.93 (d,  $J = 5.2$  Hz, 1H), 7.65 (d,  $J = 5.2$  Hz, 1H), 4.12 (m, 2H), 1.63 (m, 1H), 1.40 (m, 8H), 0.91 (m, 6H).  $^{13}\text{C}$  NMR (101 MHz,  $\text{CDCl}_3$ )  $\delta$  183.79, 153.45, 145.30, 136.10, 122.09, 119.79, 68.42, 38.97, 30.27, 28.98, 23.64, 23.03, 14.12, 11.01.

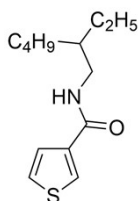

**Synthesis of *N*-(2-ethylhexyl)thiophene-3-carboxamide (4).** It was synthesized according to literature.<sup>3</sup> In an oven-dried 2-neck round bottom flask, thiophene-3-carboxylic acid (5.00 g, 39.02 mmol) was dissolved in anhydrous dichloromethane (50 mL) and anhydrous dimethylformamide (2.5 mL) under nitrogen atmosphere. After cooling to  $0^{\circ}\text{C}$ , oxalyl chloride (9.90 g, 78.04 mmol) was dropwise via syringe. Then, ice bath was removed and the mixture was stirred overnight. The mixture was concentrated under reduced pressure to remove oxalyl chloride and dichloromethane. The resulting yellow solid was re-dissolved in anhydrous dichloromethane (50 mL), a solution of 2-ethyl-1-hexylamine (12.61 g, 97.55 mmol) and triethylamine (9.87 g, 97.55 mmol) were added dropwise under ice-bath. The mixture was allowed to stir overnight, and then it was poured in water and extracted with dichloromethane three

times. The combined organic layer was washed with water, dried with  $\text{MgSO}_4$ , filtered, and concentrated under reduced pressure. The crude product was further purified via column chromatography on silica gel using hexanes/ethyl acetate (8:2) to give compound **4** as a pale-yellow solid (2.82 g, 30%).  $^1\text{H}$  NMR (400 MHz,  $\text{CDCl}_3$ )  $\delta$  7.85 (m, 1H), 7.38 (m, 1H), 7.32 (m, 1H), 6.11 (s, 1H), 3.37 (m, 2H), 1.55 (m, 1H), 1.39 (m, 8H), 0.92 (m, 6H).  $^{13}\text{C}$  NMR (101 MHz,  $\text{CDCl}_3$ )  $\delta$  163.34, 137.97, 127.94, 126.51, 126.11, 42.81, 39.60, 31.18, 29.01, 24.41, 23.13, 14.19, 11.01.

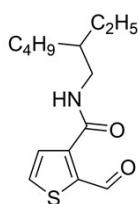

**Synthesis of N-(2-ethylhexyl)-2-formylthiophene-3-carboxamide (5).** An anhydrous THF (30.0 mL) solution of compound **4** (1.50 g, 6.27 mmol) was added to a dry flask under nitrogen atmosphere. The solution was cooled to  $-78^\circ\text{C}$  and *n*-butyl lithium (5.0 mL, 2.5 M, 12.53 mmol) was added dropwise. After stirring for 2 h, anhydrous dimethylformamide (0.92 g, 12.53 mmol) was added. After stirring at  $-78^\circ\text{C}$  for another 1 h, the mixture was warmed to room temperature and stirred for 2 h. The mixture was poured into water (50 mL), and acidified with aqueous hydrochloric acid solution (1.0 M), then extracted with dichloromethane. The organic phase was dried over anhydrous  $\text{NaSO}_4$ . After removal of the solvent under reduced pressure, the crude product was purified by column chromatography on silica gel using petroleum ether/ethyl acetate (5:1) as the eluent to give compound **5** (0.84 g, 50%) as a pale-yellow solid.  $^1\text{H}$  NMR (400 MHz,  $\text{CDCl}_3$ )  $\delta$  10.08 (s, 1H), 8.12 (s, 1H), 7.76 (d,  $J = 5.2$  Hz, 1H), 7.68 (d,  $J = 4.8$  Hz, 1H), 3.42 (m, 2H), 1.60 (m, 1H), 1.44 (m, 8H), 0.95 (m, 6H).  $^{13}\text{C}$  NMR (101 MHz,  $\text{CDCl}_3$ )  $\delta$  183.90, 161.66, 142.08, 141.62, 134.44, 132.24, 42.95, 39.38, 31.22, 29.01, 24.49, 23.13, 14.21, 11.06.



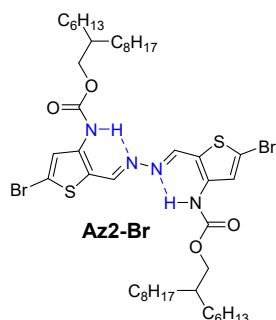

**Synthesis of bis(2-hexyldecyl) (((1E,1'E)-hydrazine-1,2-diylidenebis(methaneylidene))bis(5-bromothiophene-2,3-diyl))dicarbamate (Az2-Br).** Monomer **Az2-Br** was synthesized according to literature.<sup>4-6</sup> Compound **2** (1.90 g, 4.00 mmol) was dissolved in absolute ethanol (10.0 mL). Hydrazine hydrate (0.10 g, 80%, 2.01 mmol) in ethanol solution (5.0 mL) was added dropwise, and then 2 drops of acetic acid were added to the solution. After stirring for a few minutes, the solution turned yellow and solid precipitated. The reaction was stirred at room temperature for 4 h. The precipitate was filtrated, and washed with ethanol for several times. The product was purified by recrystallization in mixed solvent of ethanol and chloroform to give the titled compound (1.04 g, 55%) as a yellow powder. <sup>1</sup>H NMR (400 MHz, CDCl<sub>3</sub>) δ 10.29 (s, 2H), 8.40 (s, 2H), 7.96 (s, 2H), 4.12 (d, *J* = 6.0 Hz, 4H), 1.72 (s, 2H), 1.33 (m, 48H), 0.88 (m, 12H). <sup>13</sup>C NMR (101 MHz, CDCl<sub>3</sub>) δ 154.16, 153.51, 140.82, 125.67, 119.15, 116.07, 69.04, 37.67, 32.05, 31.96, 31.48, 30.19, 29.83, 29.74, 29.50, 26.91, 26.86, 22.84, 22.82, 14.27, 14.26. HRMS MALDI-TOF: *m/z* calcd for C<sub>44</sub>H<sub>72</sub>Br<sub>2</sub>N<sub>4</sub>O<sub>4</sub>S<sub>2</sub>, 945.3375; found, 945.3427.

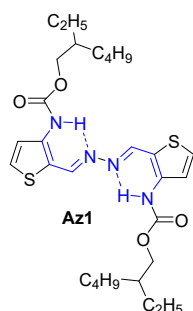

**Synthesis of bis(2-ethylhexyl) (((1E,1'E)-hydrazine-1,2-diylidenebis(methaneylidene))bis(thiophene-2,3-diyl))dicarbamate (Az1).** The same procedure described for the synthesis of **Az2-Br** was followed. 2-Ethylhexyl(5-bromo-2-formylthiophen-3-yl) carbamate<sup>2</sup> (**3**) (1.14 g, 4.02 mmol), hydrazine hydrate (80%, 0.10 g, 2.01 mmol)

and ethanol (10.0 mL) were used. The product was purified by recrystallization in mixed solvent of ethanol and chloroform to give the titled compound (0.79 g, 70%) as a bright yellow powder.  $^1\text{H}$  NMR (400 MHz,  $\text{CDCl}_3$ )  $\delta$  10.35 (s, 2H), 8.57 (s, 2H), 7.92 (s, 2H), 7.49 (d,  $J = 5.6$  Hz, 2H), 4.14 (d,  $J = 6.0$  Hz, 4H), 1.72 (m, 2H), 1.46 (m, 16H), 0.97 (m, 12 H).  $^{13}\text{C}$  NMR (101 MHz,  $\text{CDCl}_3$ )  $\delta$  155.28, 153.76, 141.12, 130.74, 122.41, 115.01, 68.43, 39.09, 30.61, 29.06, 24.03, 23.15, 14.24, 11.24. HRMS MALDI-TOF:  $m/z$  calcd for  $\text{C}_{28}\text{H}_{42}\text{N}_4\text{O}_4\text{S}_2$ , 563.2681; found, 563.2740.

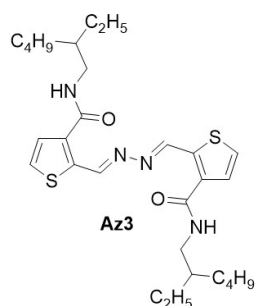

**Synthesis of 2,2'-((1E,1'E)-hydrazine-1,2-diylidenebis(methaneylylidene))bis(N-(2-ethylhexyl)thiophene-3-carboxamide) (Az3).** The same procedure described for the synthesis of Az1. *N*-(2-ethylhexyl)-2-formylthiophene-3-carboxamide (**5**) (0.50 g, 1.87 mmol), hydrazine hydrate (80%, 0.10 g, 2.01 mmol) and ethanol (10 mL) were used. The product was purified by recrystallization in mixed solvent of ethanol and chloroform to give the titled compound (0.36 g, 72%) as bright yellow needle-like solid.  $^1\text{H}$  NMR (400 MHz,  $\text{CDCl}_3$ )  $\delta$  9.22 (s, 2H), 7.46 (d,  $J = 5.2$  Hz, 2H), 7.35f (d,  $J = 5.2$  Hz, 2H), 6.81 (s, 2H), 3.41 (m, 4H), 1.59 (s, 2H), 1.41 (m, 16H), 0.95 (m, 12H).  $^{13}\text{C}$  NMR (101 MHz,  $\text{CDCl}_3$ )  $\delta$  163.16, 156.05, 139.89, 138.86, 129.71, 128.60, 43.07, 39.53, 31.28, 29.02, 24.50, 23.19, 14.23, 11.03. HRMS MALDI-TOF:  $m/z$  calcd for  $\text{C}_{28}\text{H}_{42}\text{N}_4\text{O}_2\text{S}_2$ , 531.2783; found, 531.2815.

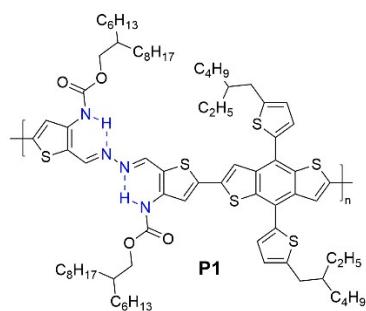

### Synthesis of polymer **P1**.

**Az2-Br** (0.095 g, 0.10 mmol), (4,8-bis(5-(2-ethylhexyl)thiophen-2-yl)benzo[1,2-b:4,5-b']dithiophene-2,6-diyl)bis(trimethylstannane) (**BDT**) (0.097 g, 0.10 mmol), Pd<sub>2</sub>(dba)<sub>3</sub> (0.002 g, 0.002 mmol) and P(*o*-tol)<sub>3</sub> (0.003 g, 0.084 mmol) and degassed anhydrous toluene (6.0 mL) were added to a Schlenk flask. The mixture was stirred at 120°C for 2 h. After cooling to room temperature, the mixture was precipitated in methanol and was filtered. The residue was washed with methanol, *n*-hexane, dichloromethane under nitrogen in a Soxhlet extractor. The polymer was dissolved and concentrated in the chloroform, and was precipitated with methanol and filtered to give **P1** (0.127 g, 87%) as a dark purple solid.  $M_n = 160.1$  kDa;  $M_w = 488.6$  kDa; PDI = 3.1. Anal. Calcd for C<sub>80</sub>H<sub>118</sub>N<sub>4</sub>O<sub>4</sub>S<sub>6</sub>: C 69.10, H 8.73, N 3.54; Found: C 69.02, H 8.54, N 3.54.

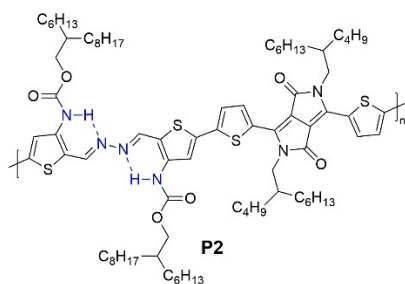

### Synthesis of polymer **P2**.

Polymer **P2** was synthesized by a similar experimental procedure as **P1**. **Az2-Br** (0.095 g, 0.10 mmol), 2,5-bis(2-butyloctyl)-3,6-bis(5-(trimethylstannyl)thiophen-2-yl)-2,5-dihydropyrrolo[3,4-c]pyrrole-1,4-dione (**DPP**) (0.091 g, 0.10 mmol), Pd<sub>2</sub>(dba)<sub>3</sub> (0.002 g, 0.002 mmol) and P(*o*-tol)<sub>3</sub> (0.003 g, 0.084 mmol) and anhydrous toluene (6.0 mL) were used. The polymer **P2** (0.126 g, 90%) was a dark green solid.  $M_n = 66.0$  kDa;  $M_w = 226.9$  kDa; PDI = 3.4. Anal. Calcd for C<sub>84</sub>H<sub>132</sub>N<sub>6</sub>O<sub>6</sub>S<sub>4</sub>: C 69.25, H 9.23, N 5.67; Found: C 69.57, H 9.17, N 5.79.

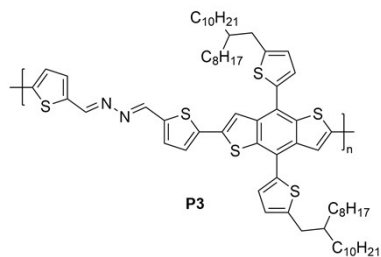

### Synthesis of polymer **P3**.

Polymer **P3** was synthesized by a similar experimental procedure as **P1**. **Az-Br**<sup>1</sup> (0.049 g, 0.13 mmol), (4,8-bis(5-(2-octyldodecyl)thiophen-2-yl)benzo[1,2-b:4,5-b']dithiophene-2,6-diyl)bis(trimethylstannane) (0.162 g, 0.13 mmol), Pd<sub>2</sub>(dba)<sub>3</sub> (0.002 g, 0.002 mmol) and P(*o*-tol)<sub>3</sub> (0.003 g, 0.084 mmol) were added in degassed anhydrous toluene (6 mL) under nitrogen. The mixture was stirred at 120°C for 72 h. The polymer **P3** (0.127 g, 84%) was a dark purple solid.  $M_n = 36.2$  kDa;  $M_w = 110.6$  kDa; PDI = 3.1. Anal. Calcd for C<sub>70</sub>H<sub>100</sub>N<sub>2</sub>S<sub>6</sub>: C 72.28, H 8.65, N 2.32; Found: C 72.36, H 8.68, N 2.41.

## Crystallographic data

**Table S1.** Crystal data and structure refinement for **Az2**.

|                                   |                                                                                                                               |
|-----------------------------------|-------------------------------------------------------------------------------------------------------------------------------|
| Empirical formula                 | $C_{28}H_{42}N_4O_4S_2$                                                                                                       |
| Formula weight                    | 562.77                                                                                                                        |
| Temperature                       | 173(2) K                                                                                                                      |
| Wavelength                        | 1.54178 Å                                                                                                                     |
| Crystal system, space group       | Triclinic, P-1                                                                                                                |
| Unit cell dimensions              | a = 5.0119(4) Å alpha = 101.744(5) deg.<br>b = 10.5046(8) Å beta = 99.652(5) deg.<br>c = 14.7245(13) Å gamma = 96.654(4) deg. |
| Volume                            | 739.15(11) Å <sup>3</sup>                                                                                                     |
| Z, Calculated density             | 1, 1.264 Mg/m <sup>3</sup>                                                                                                    |
| Absorption coefficient            | 1.947 mm <sup>-1</sup>                                                                                                        |
| F(000)                            | 302                                                                                                                           |
| Crystal size                      | 0.160 x 0.140 x 0.120 mm                                                                                                      |
| Theta range for data collection   | 3.126 to 66.642 deg.                                                                                                          |
| Limiting indices                  | -5 ≤ h ≤ 5, -12 ≤ k ≤ 11, -17 ≤ l ≤ 17                                                                                        |
| Reflections collected / unique    | 6767 / 2509 [R(int) = 0.0725]                                                                                                 |
| Completeness to theta             | 66.642 96.4%                                                                                                                  |
| Absorption correction             | Semi-empirical from equivalents                                                                                               |
| Max. and min. transmission        | 0.7531 and 0.5301                                                                                                             |
| Refinement method                 | Full-matrix least-squares on F <sup>2</sup>                                                                                   |
| Data / restraints / parameters    | 2509 / 0 / 177                                                                                                                |
| Goodness-of-fit on F <sup>2</sup> | 1.102                                                                                                                         |
| Final R indices [I > 2σ(I)]       | R1 = 0.1326, wR2 = 0.3773                                                                                                     |
| R indices (all data)              | R1 = 0.1703, wR2 = 0.4003                                                                                                     |
| Extinction coefficient            | n/a                                                                                                                           |
| Largest diff. peak and hole       | 1.233 and -0.490 e.Å <sup>-3</sup>                                                                                            |

**Table S2.** Selected bond distances and torsion angles for compound **Az2**.

| Bond type               | Bond length (Å) | Torsion angles (°) |
|-------------------------|-----------------|--------------------|
| N(1)=C(5)               | 1.281(11)       |                    |
| N(1)—N(1A)              | 1.378(12)       |                    |
| N(1)···H                | 2.2230(889)     |                    |
| N(1)···N(2)             | 2.8701(85)      |                    |
| N(2)—H                  | 0.7930(998)     |                    |
| N(1A)—C(5A)             | 1.281(11)       |                    |
| N(1A)···H               | 2.2230(889)     |                    |
| N(1A)—N(2A)             | 2.8701(85)      |                    |
| N(2A)—H                 | 0.7930(998)     |                    |
| S(1)-C(4)-C(5)-N(1)     |                 | 179.097(669)       |
| S(1A)-C(4A)-C(5A)-N(1A) |                 | -179.097(669)      |
| C(5)=N(1)-N(1A)=C(5A)   |                 | 180.000(745)       |

**Table S3.** Summary of X-ray crystallographic results of two single crystals.

|                  | Structure                                                                                                 | Packing motif               | Packing motif picture                                                                | Bond length (Å) |                 |
|------------------|-----------------------------------------------------------------------------------------------------------|-----------------------------|--------------------------------------------------------------------------------------|-----------------|-----------------|
|                  |                                                                                                           |                             |                                                                                      | C=N             | N-N             |
| Previous reports | <p><b>Az 1, 7</b></p> 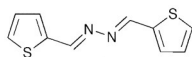 | Slipped herringbone packing |  | 1.280,<br>1.281 | 1.402,<br>1.412 |
| This work        | <p><b>Az1</b></p>      | Lamellar packing            |  | 1.281           | 1.378           |

## Theoretical calculation of P1 and P2

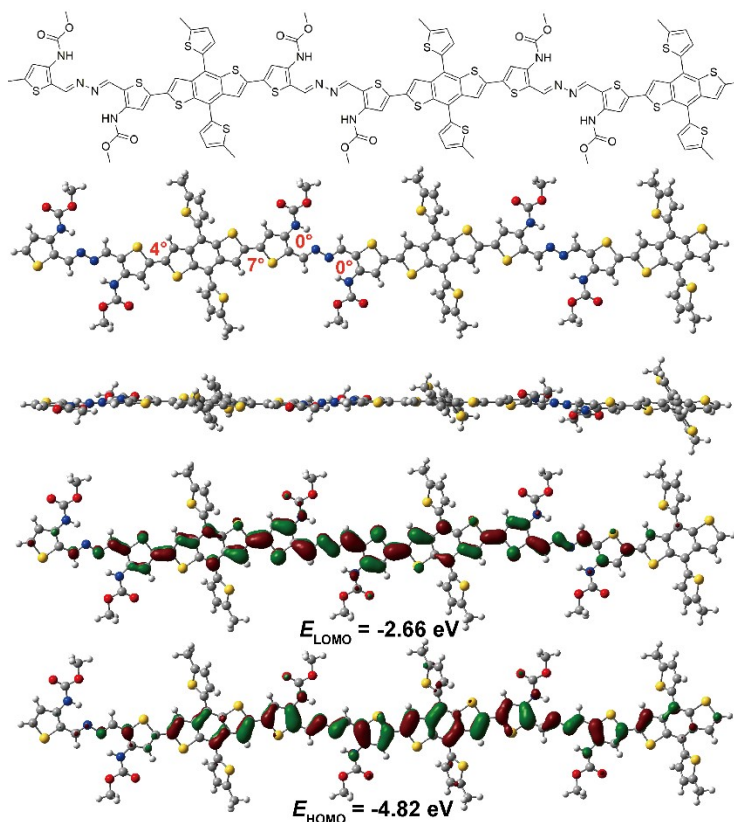

**Figure S1.** Calculated molecular geometries and frontier molecular orbitals of P1 trimers at B3LYP-D3/6-31G(d) level.

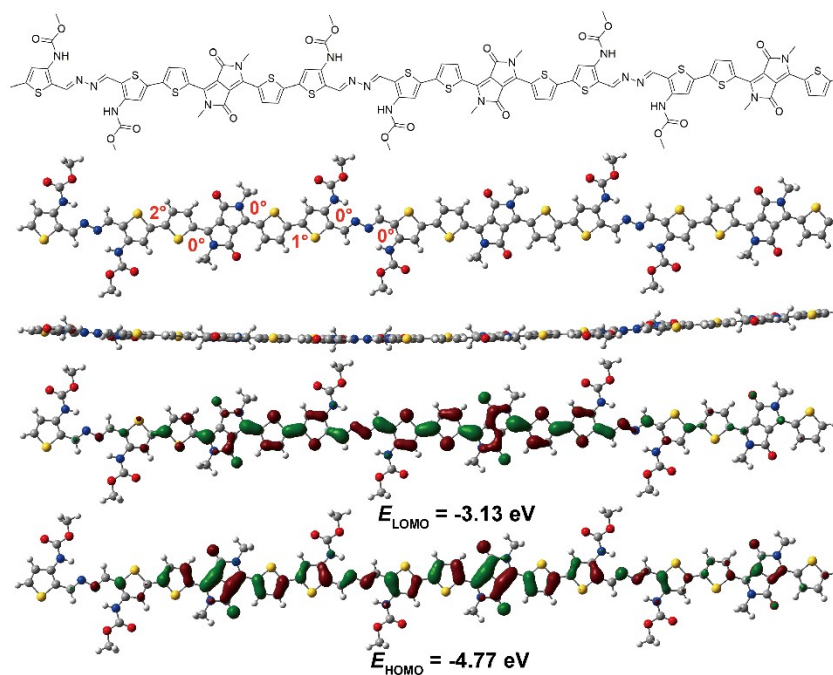

**Figure S2.** Calculated molecular geometries and frontier molecular orbitals of P2 trimers at B3LYP-D3/6-31G(d) level.

## Thermal properties of polymers

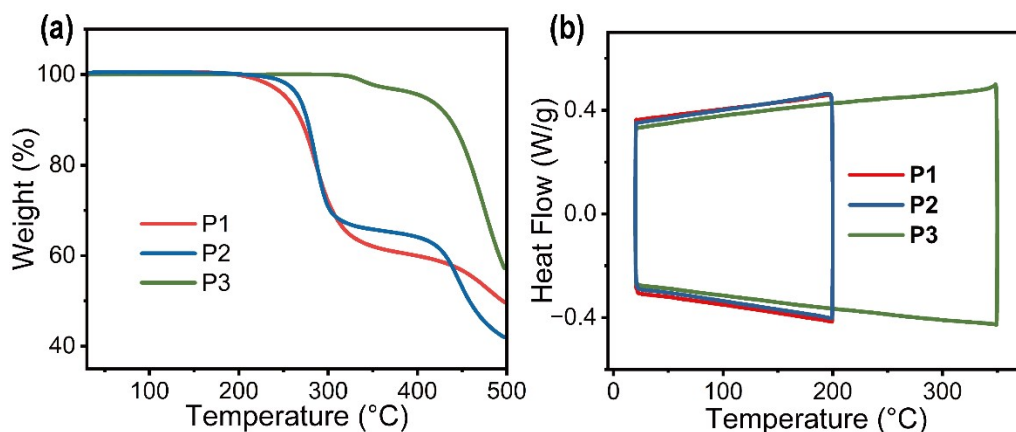

**Figure S3.** The (a) TGA and (b) DSC curves of **P1**, **P2** and **P3**.

## Absorption spectra of polymers

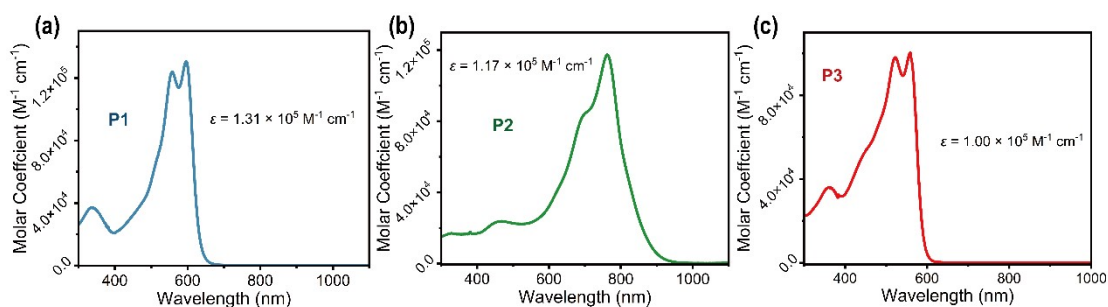

**Figure S4.** Absorption spectra of polymer solutions at room temperature (a) **P1**, (b) **P2** and (c) **P3**.

## Performances of OPV and OFET devices

**Table S4.** Device performances of the **P1:Y6** based solar cells fabricated with different D/A ratios (with 0.5% of CN).

| Solvent | D: A  | $V_{oc}$ (V)       | $J_{sc}$ (mA cm <sup>-2</sup> ) | FF (%)            | PCE (%)         |
|---------|-------|--------------------|---------------------------------|-------------------|-----------------|
| CF      | 1:1   | 0.82 (0.80 ± 0.03) | 19.4 (19.1 ± 0.4)               | 42.3 (41.2 ± 1.1) | 6.5 (6.3 ± 0.3) |
|         | 1:1.2 | 0.87 (0.84 ± 0.04) | 20.0 (19.5 ± 0.6)               | 53.0 (50.8 ± 2.2) | 8.2 (8.1 ± 0.2) |
|         | 1:1.5 | 0.85 (0.82 ± 0.04) | 19.0 (18.8 ± 0.5)               | 47.4 (46.6 ± 0.8) | 7.6 (7.5 ± 0.2) |

Average values were obtained from 10 OPV devices.



**Table S5.** The Field-Effect Performances of **P2** based devices.

| Annealing temperature (°C) | $\mu_{h,max}/\mu_{h,avg}$ <sup>a</sup><br>(cm <sup>2</sup> V <sup>-1</sup> s <sup>-1</sup> ) | $V_T$ (V)  | $I_{on}/I_{off}$                 |
|----------------------------|----------------------------------------------------------------------------------------------|------------|----------------------------------|
| as-spun                    | 0.013/0.011                                                                                  | -18 to -21 | 10 <sup>4</sup> -10 <sup>5</sup> |
| 60                         | 0.017/0.015                                                                                  | -13 to -21 | 10 <sup>5</sup> -10 <sup>6</sup> |
| 120                        | 0.022/0.022                                                                                  | -9 to -12  | 10 <sup>4</sup> -10 <sup>5</sup> |
| 180                        | 0.034/0.033                                                                                  | -11 to -16 | 10 <sup>5</sup> -10 <sup>6</sup> |

<sup>a</sup> Average values were obtained from 10 OFET devices.

## 2D Grazing Incidence Wide Angle X-ray Scattering (GIWAXS) data

**Table S6.** The parameters of 2D GIWAXS.

| Films                             | π-π stacking          |                                |                          | Lamella stacking      |                                |                          |
|-----------------------------------|-----------------------|--------------------------------|--------------------------|-----------------------|--------------------------------|--------------------------|
|                                   | q (nm <sup>-1</sup> ) | d-Spacing <sup>a</sup><br>(nm) | CCL <sup>b</sup><br>(nm) | q (nm <sup>-1</sup> ) | d-Spacing <sup>a</sup><br>(nm) | CCL <sup>b</sup><br>(nm) |
| <b>P1</b>                         | 17.0272               | 0.3690                         | 2.1436                   | 2.7444                | 2.2895                         | 8.7433                   |
| <b>P1:Y6</b>                      | 17.5970               | 0.3571                         | 2.2597                   | 2.6362                | 2.3834                         | 9.7817                   |
| <b>P2</b><br>As-spun              | 17.1985               | 0.3650                         | 1.9244                   | 3.0415                | 2.0658                         | 8.2020                   |
| <b>P2</b><br>Annealed at<br>180°C | 17.2458               | 0.3643                         | 2.1772                   | 3.0514                | 2.0591                         | 11.2920                  |

<sup>a</sup> Computed using the relationship  $d = 2\pi/q$ , where q is the diffraction peak in the x-coordinate. <sup>b</sup> CCL =  $2\pi/\text{FWHM}$ , where FWHM indicates full width at half maximum.

# $^1\text{H}$ NMR, $^{13}\text{C}$ NMR and MALDI-MS Spectrum

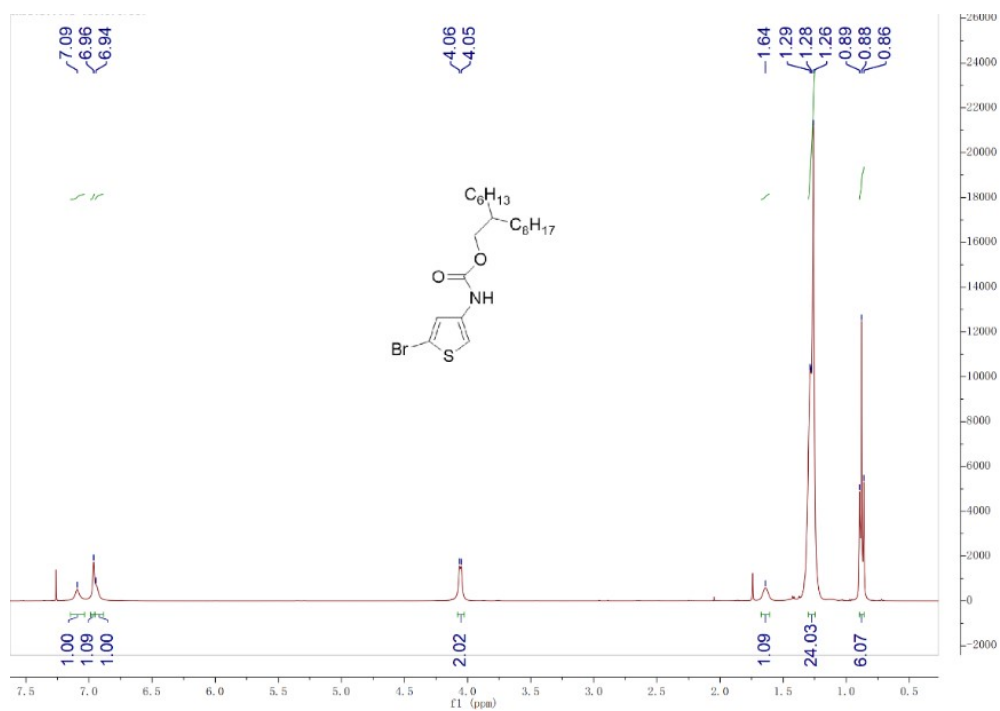

Figure S5. The  $^1\text{H}$  NMR spectrum of compound **1** in  $\text{CDCl}_3$ .

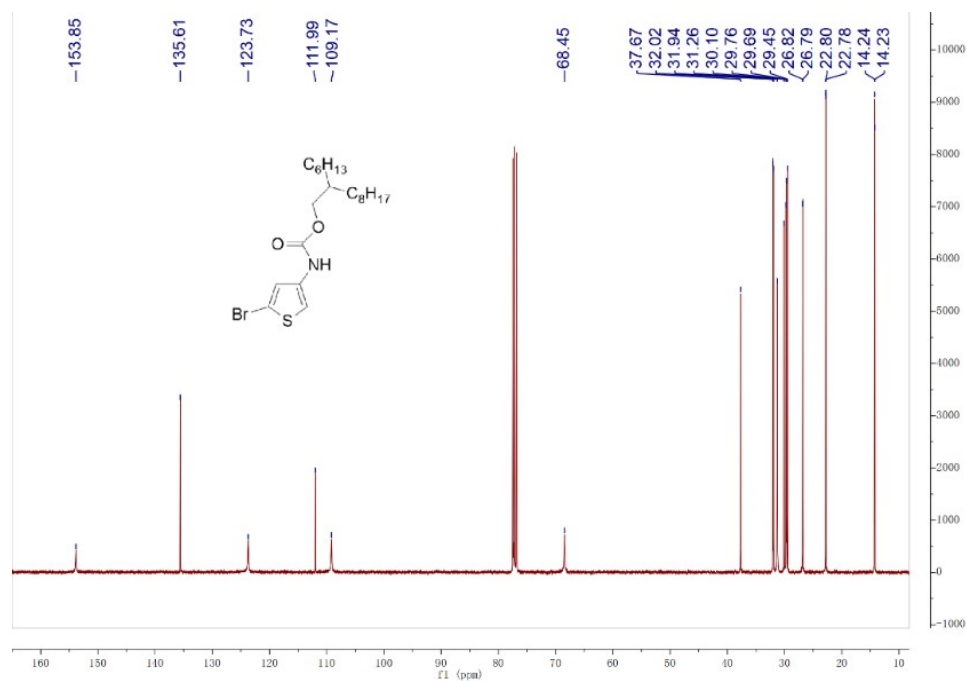

Figure S6. The  $^{13}\text{C}$  NMR spectrum of compound **1** in  $\text{CDCl}_3$ .

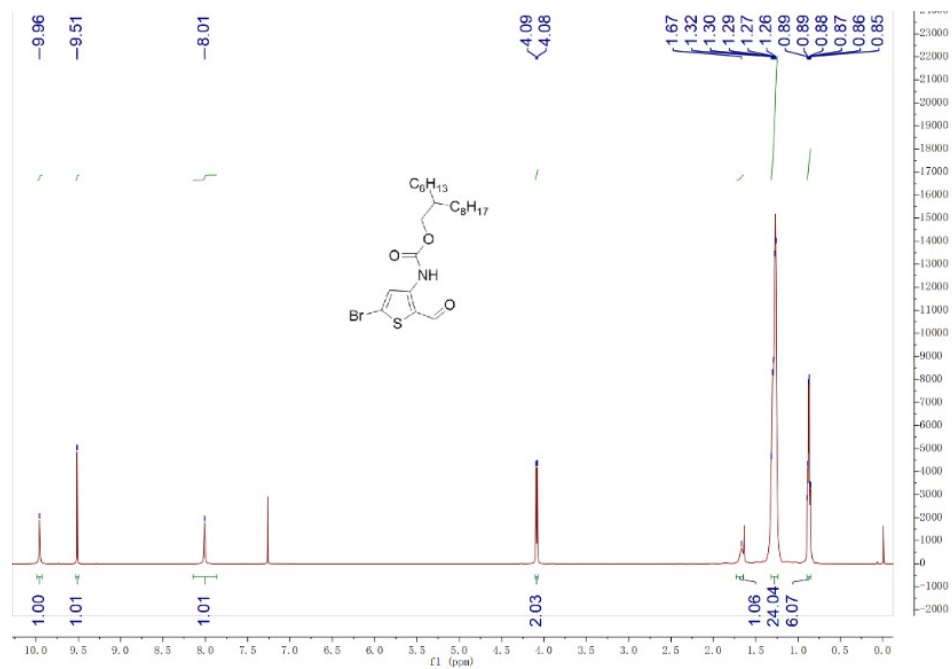

Figure S7. The  $^1\text{H}$  NMR spectrum of compound **2** in  $\text{CDCl}_3$ .

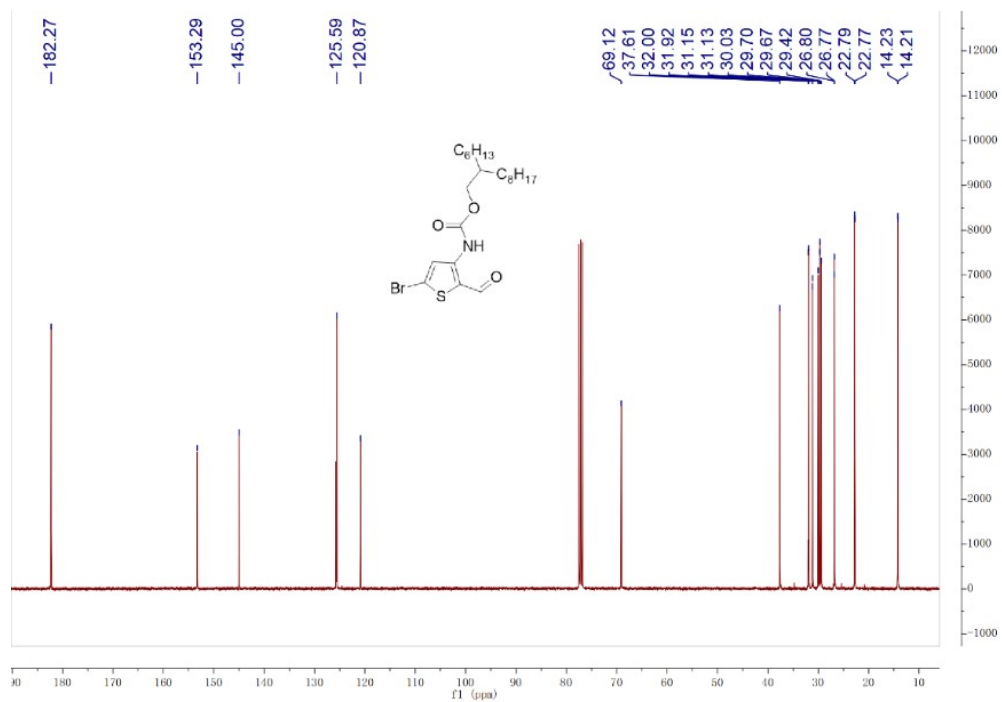

Figure S8. The  $^{13}\text{C}$  NMR spectrum of compound **2** in  $\text{CDCl}_3$ .

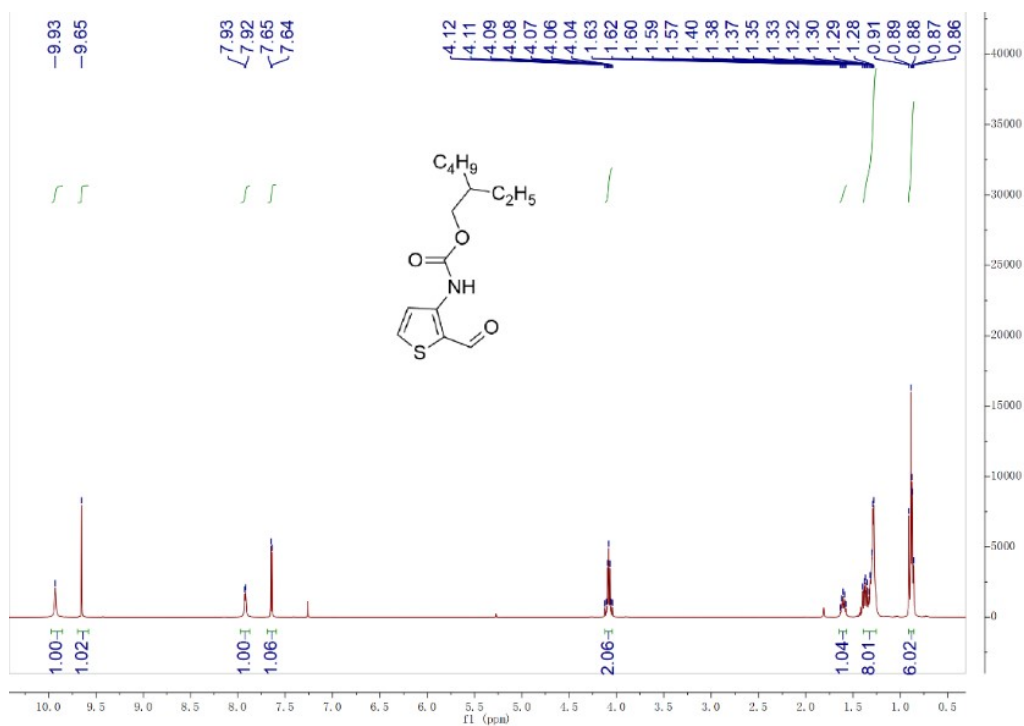

Figure S9. The  $^1\text{H}$  NMR spectrum of compound 3 in  $\text{CDCl}_3$ .

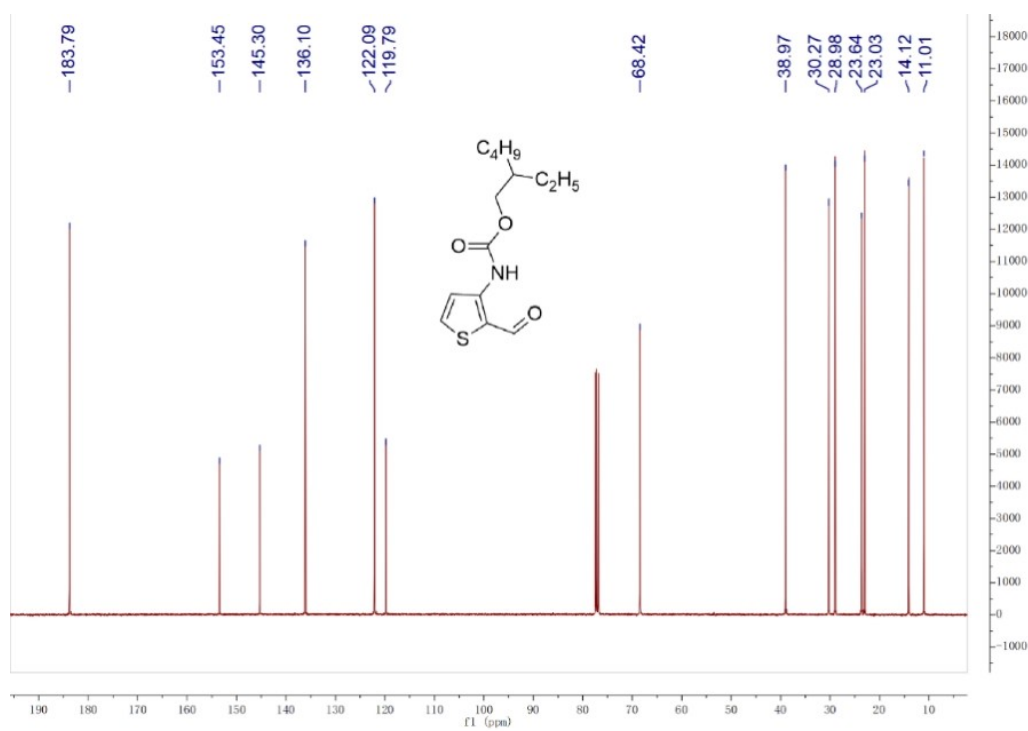

Figure S10. The  $^{13}\text{C}$  NMR spectrum of compound 3 in  $\text{CDCl}_3$ .

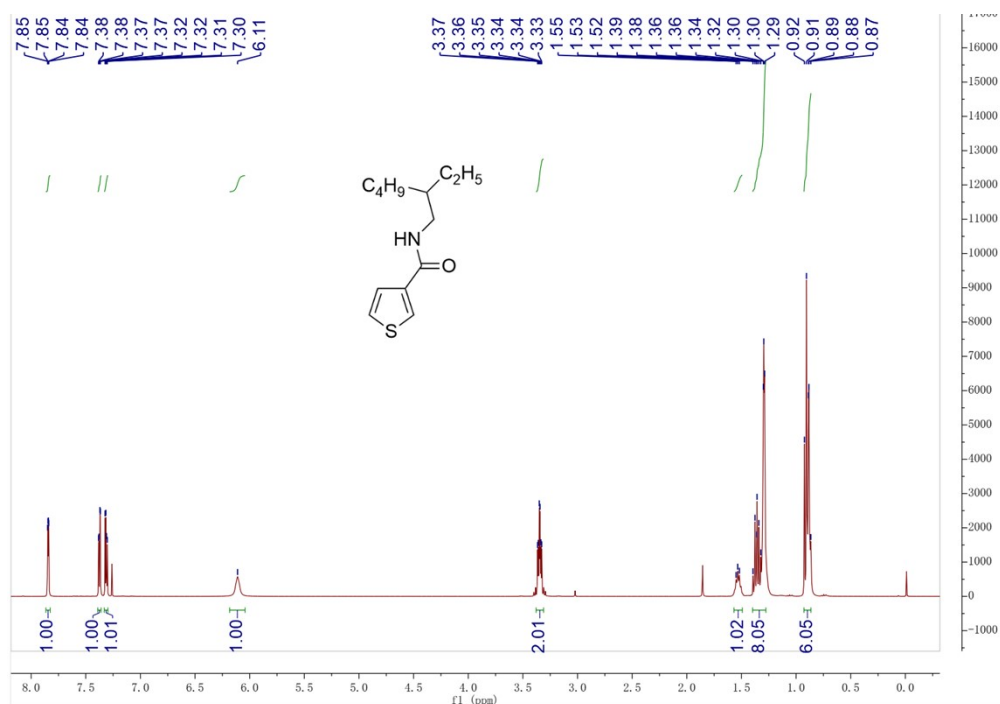

Figure S11. The  $^1\text{H}$  NMR spectrum of compound 4 in  $\text{CDCl}_3$ .

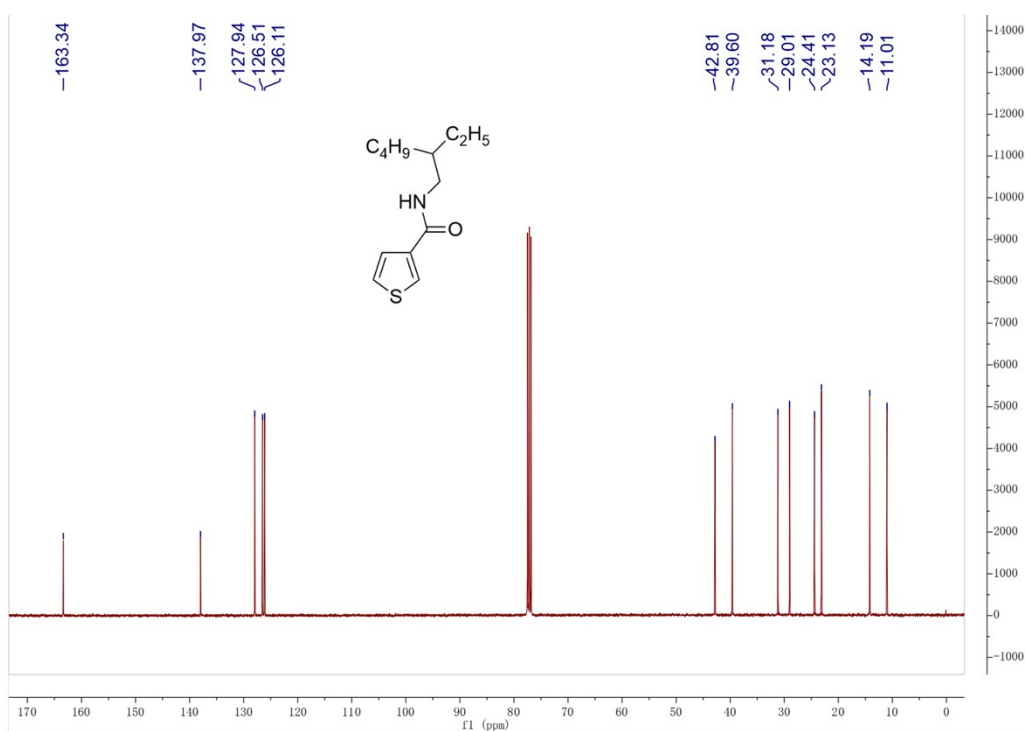

Figure S12. The  $^{13}\text{C}$  NMR spectrum of compound 4 in  $\text{CDCl}_3$ .

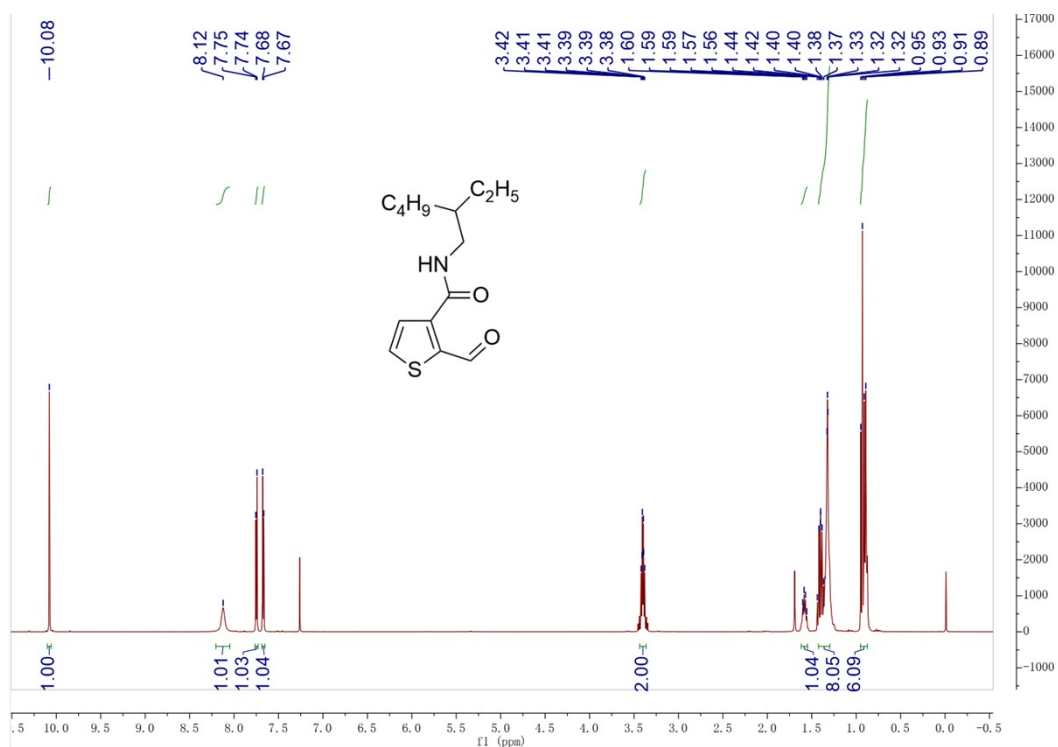

Figure S13. The <sup>1</sup>H NMR spectrum of compound 5 in CDCl<sub>3</sub>.

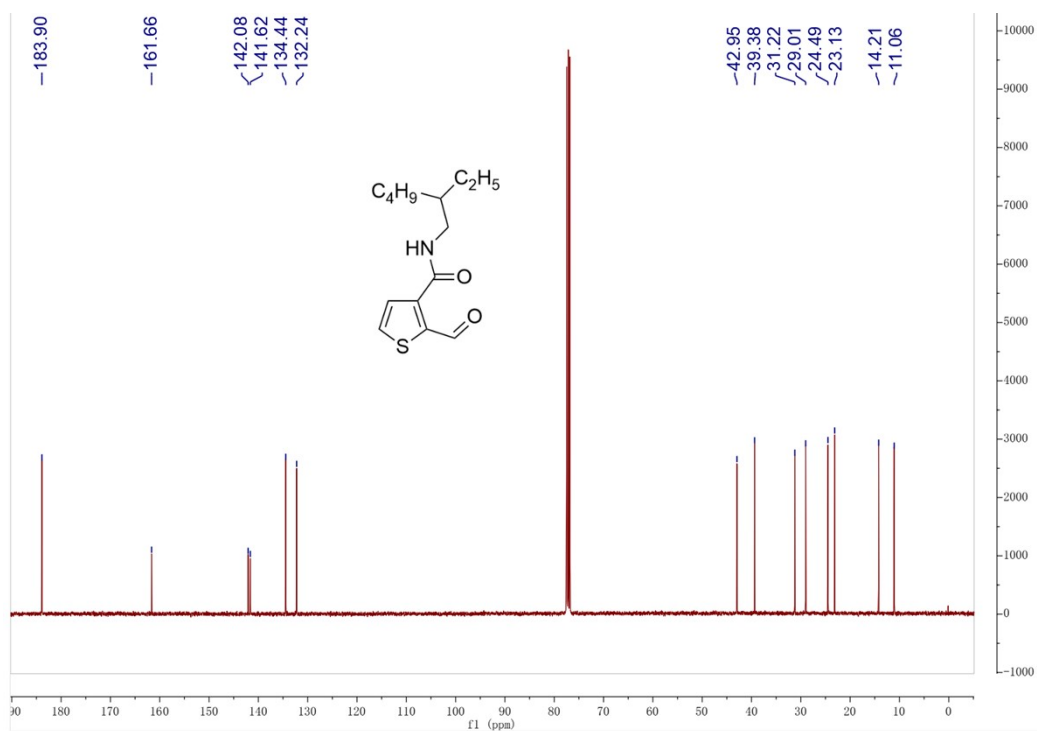

Figure S14. The <sup>13</sup>C NMR spectrum of compound 5 in CDCl<sub>3</sub>.

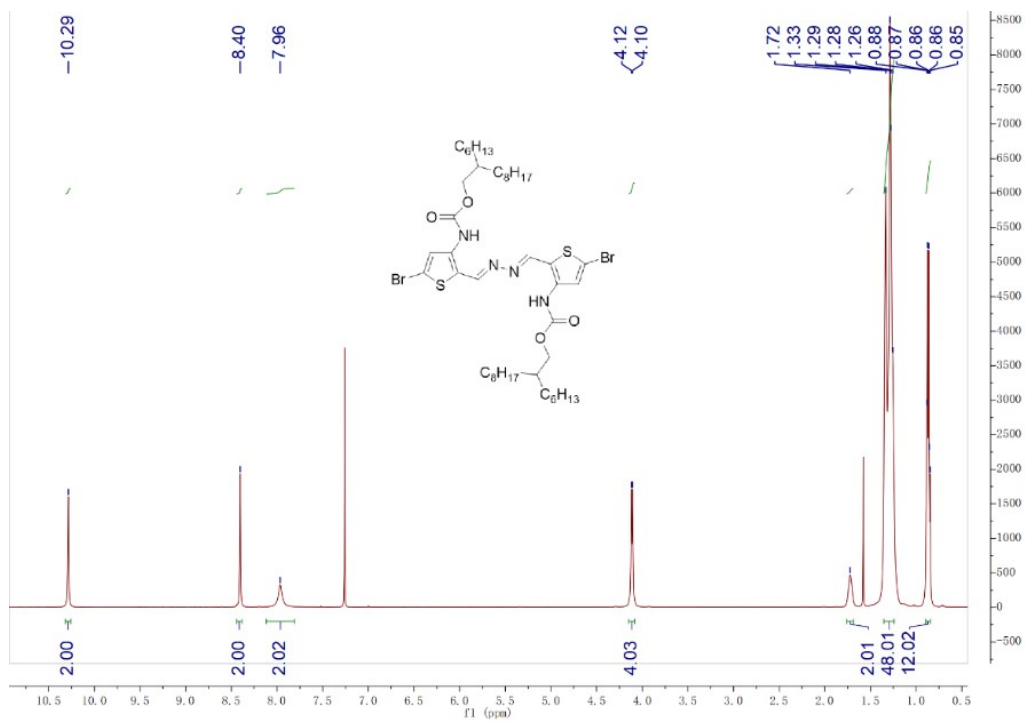

Figure S15. The  $^1H$  NMR spectrum of monomer Az2-Br in  $CDCl_3$ .

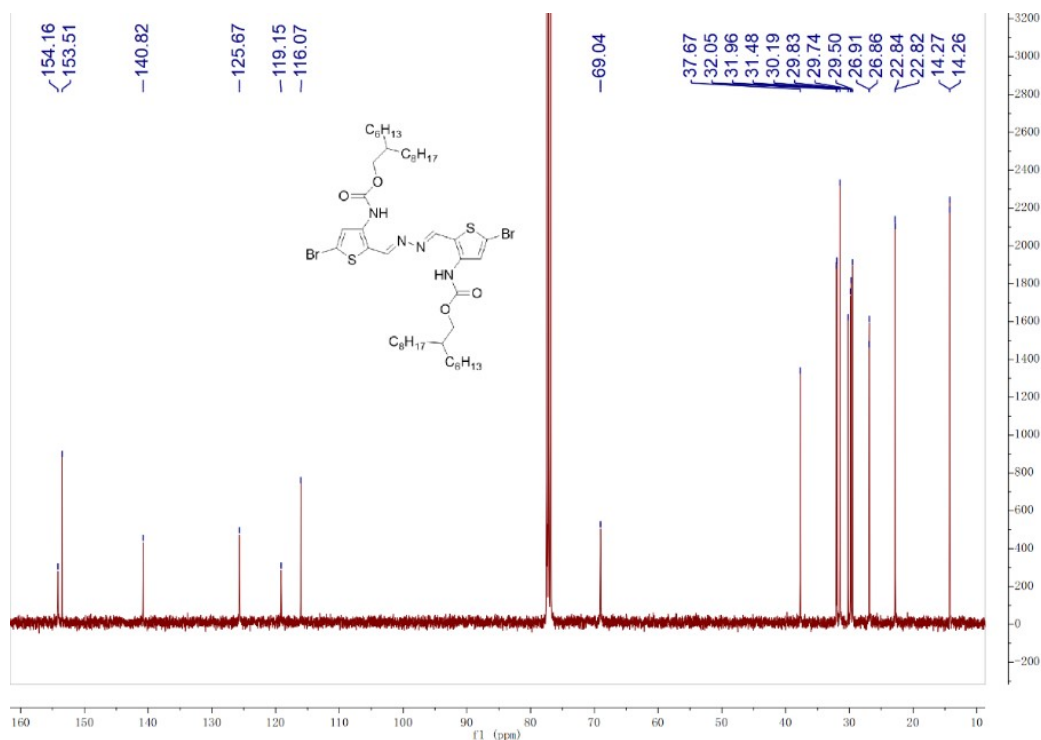

Figure S16. The  $^{13}C$  NMR spectrum of monomer Az2-Br in  $CDCl_3$ .

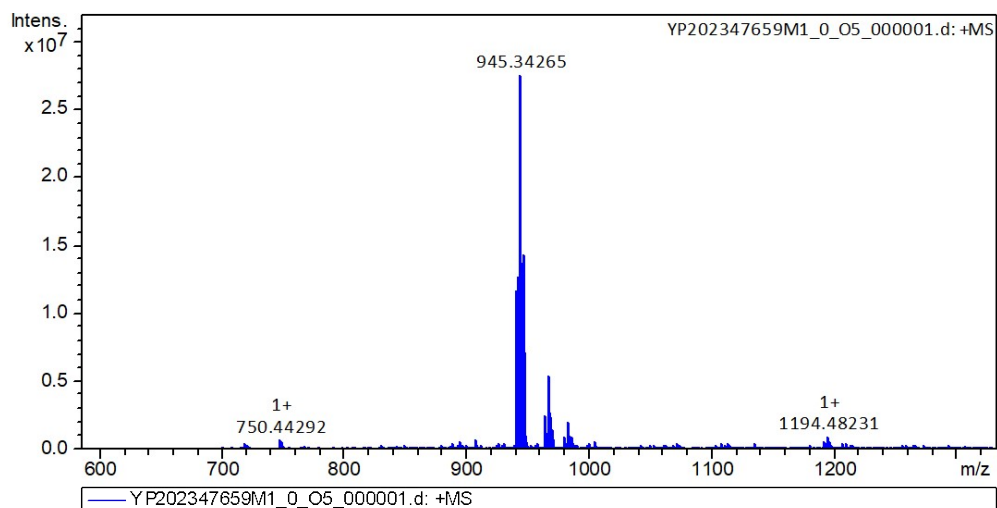

**Figure S17.** The MALDI-MS spectrum of Az2-Br.

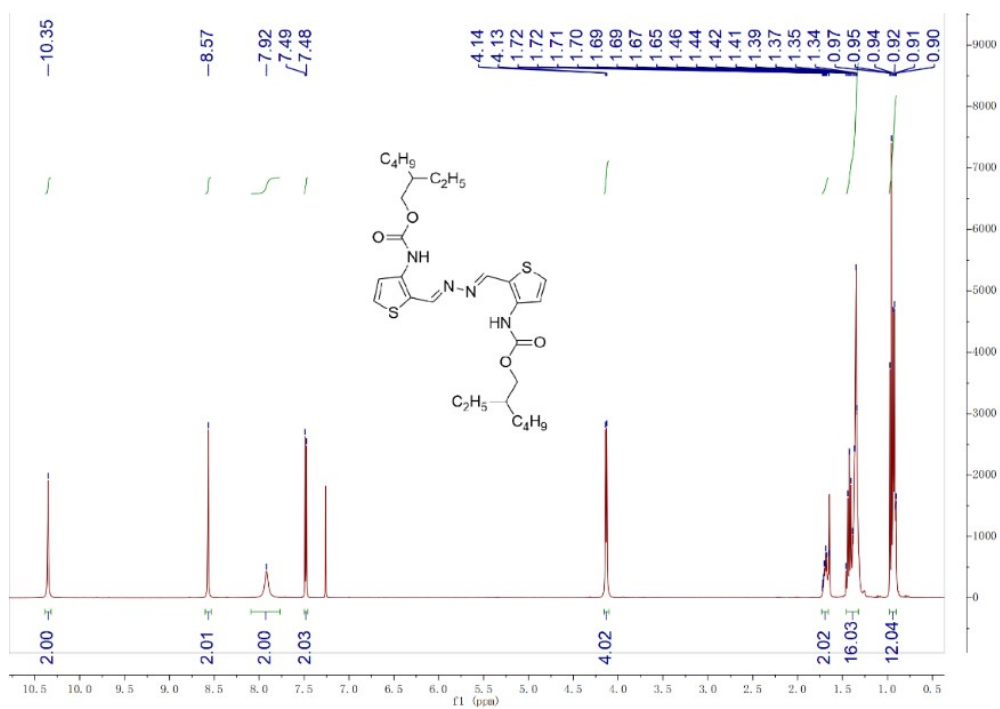

**Figure S18.** The <sup>1</sup>H NMR spectrum of monomer Az1 in CDCl<sub>3</sub>.



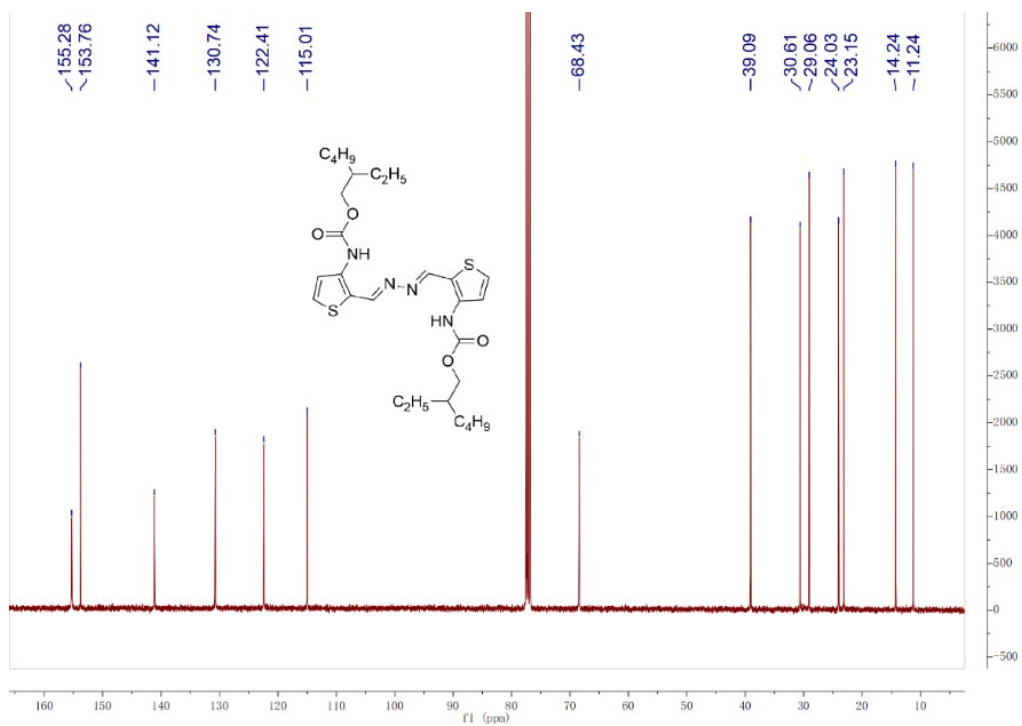

**Figure S19.** The <sup>13</sup>C NMR spectrum of monomer **Az1** in CDCl<sub>3</sub>.

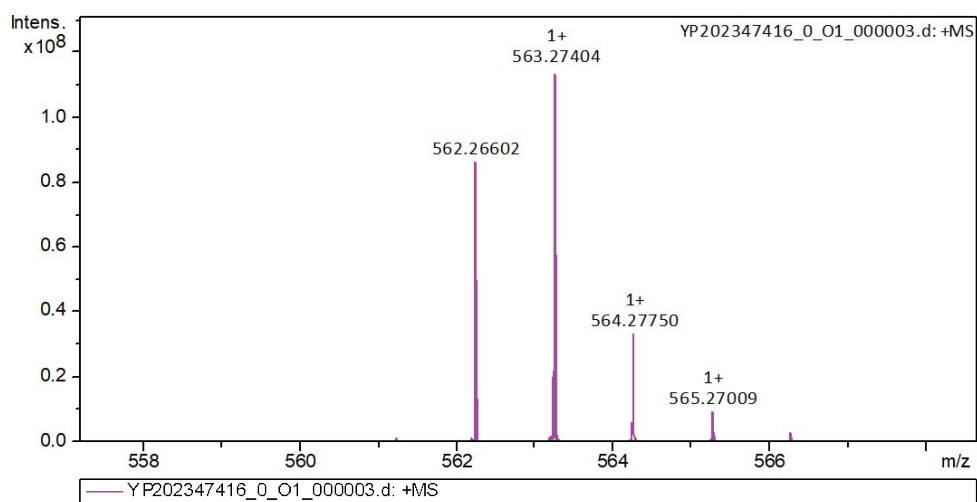

**Figure S20.** The MALDI-MS spectrum of **Az1**.

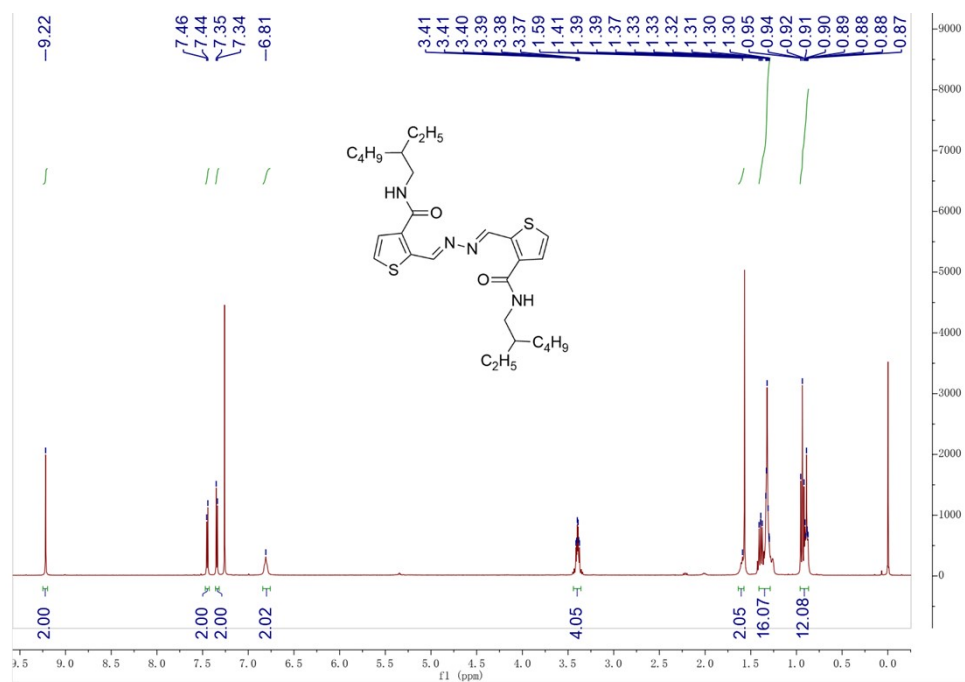

Figure S21. The  $^1H$  NMR spectrum of monomer **Az3** in  $CDCl_3$ .

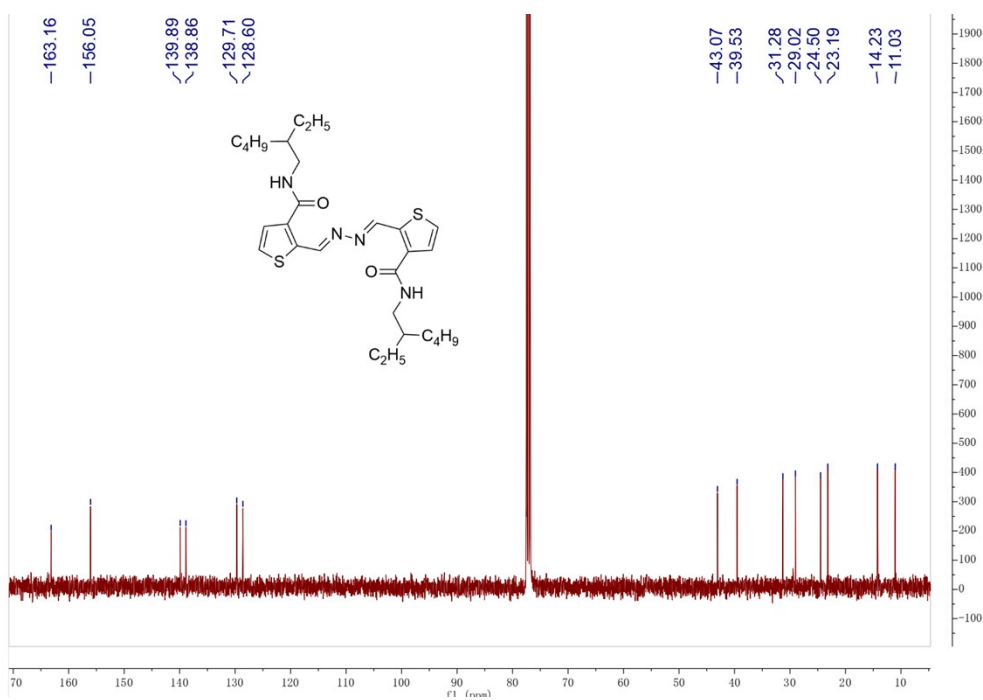

Figure S22. The  $^{13}C$  NMR spectrum of monomer **Az3** in  $CDCl_3$ .

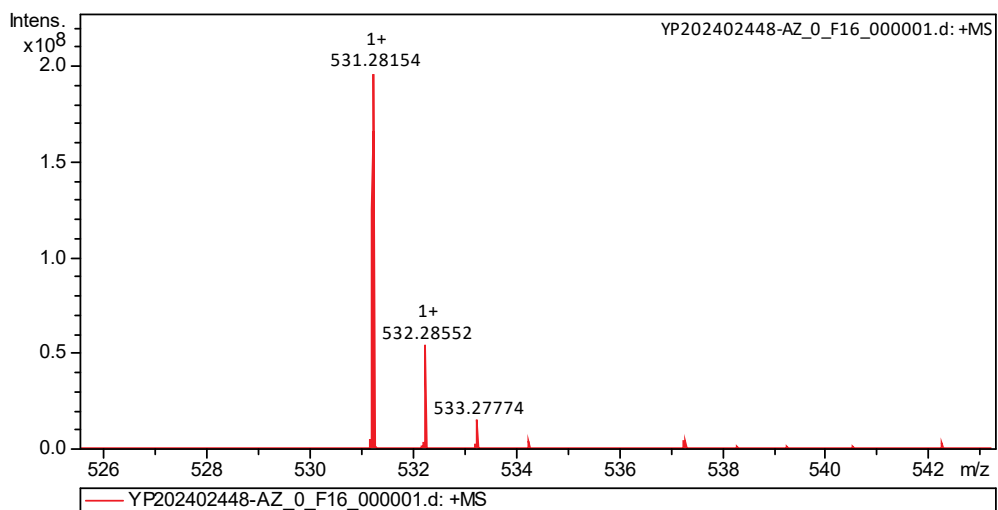

**Figure S23.** The MALDI-MS spectrum of **Az3**.

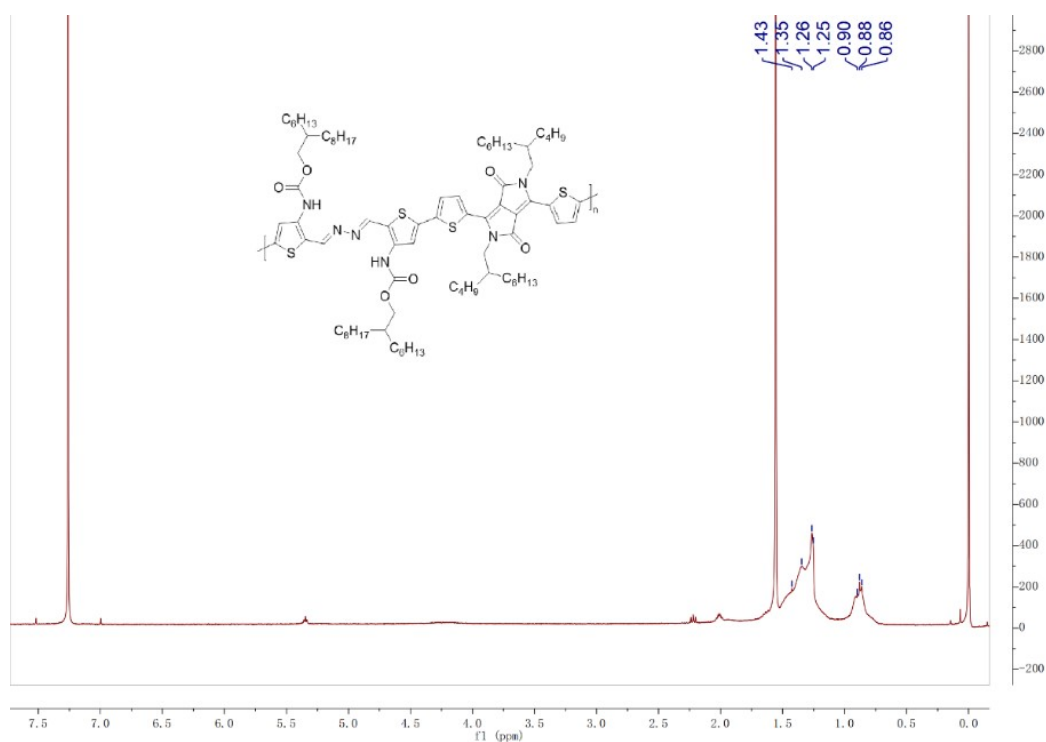

**Figure S24.** The  $^1H$  NMR spectrum of polymer **P1** in  $CDCl_3$ .

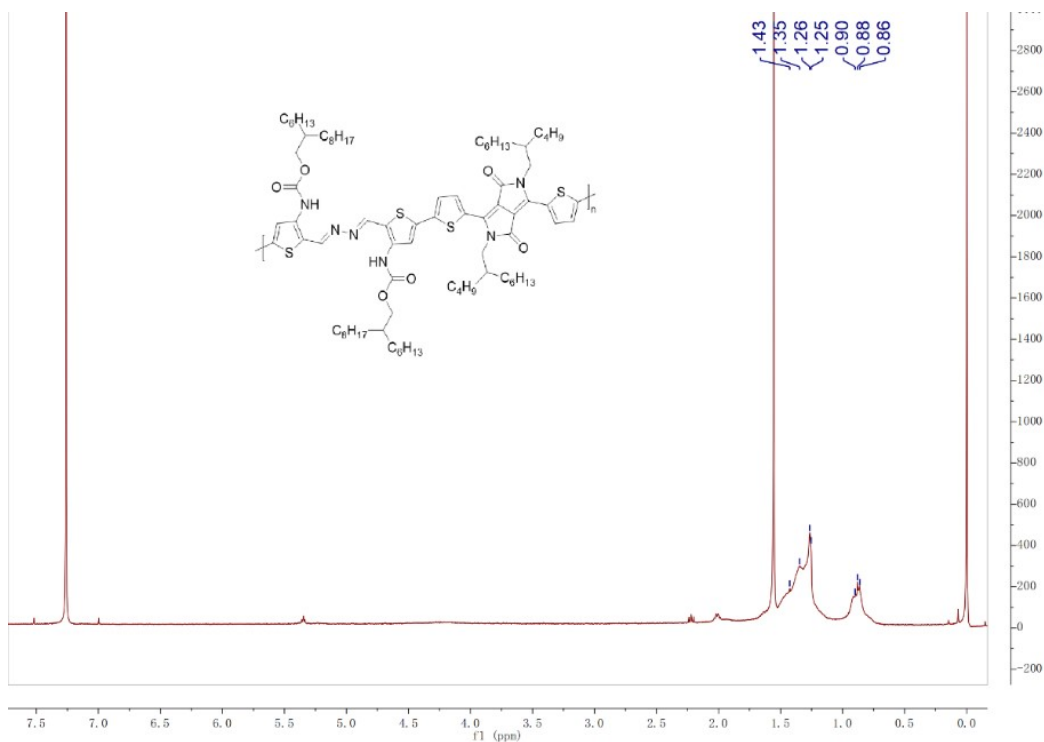

**Figure S25.** The  $^1\text{H}$  NMR spectrum of polymer **P2** in  $\text{CDCl}_3$ .

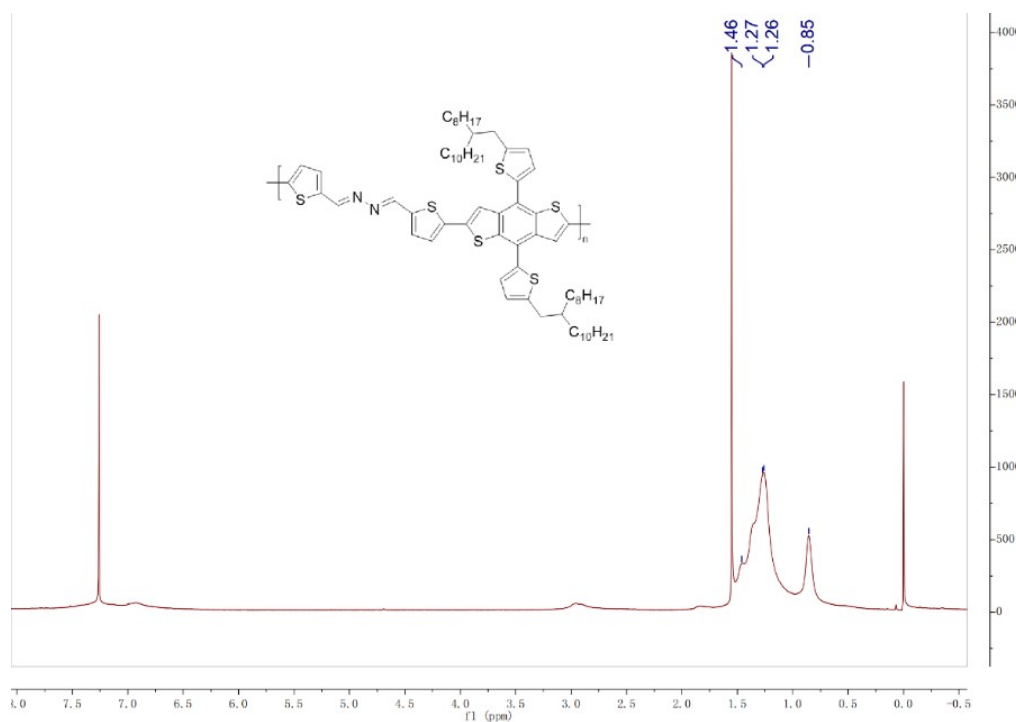

**Figure S26.** The  $^1\text{H}$  NMR spectrum of polymer **P3** in  $\text{CDCl}_3$ .

## References

1. M. Ghazzali, V. Langer, C. Lopes, A. Eriksson and L. Öhrström, *New Journal of Chemistry*, 2007, **31**, 1777-1784.
2. B. Zhang, Y. Wang, K. Lin, Y. Zhou and Q. Zhang, *Journal of Materials Chemistry C*, 2024.
3. L. Ye, R. M. Pankow, M. Horikawa, E. L. Melenbrink, K. Liu and B. C. Thompson, *Macromolecules*, 2019, **52**, 9383-9388.
4. R. Venkatesan and L. Cindrella, *Synthetic Metals*, 2018, **246**, 150-163.
5. D. Sek, K. Bijak, M. Grucela-Zajac, M. Filapek, L. Skorka, M. Siwy, H. Janeczek and E. Schab-Balcerzak, *Synthetic Metals*, 2012, **162**, 1623-1635.
6. I. Mihai, M. Ivanoiu, L. Vacareanu and M. Grigoras, *e-Polymers*, 2011, **11**.
7. D. K. Geiger, H. C. Geiger and L. M. Szczesniak, *Acta Crystallographica Section E: Structure Reports Online*, 2013, **69**, o916-o916.
